# Supplementary material for: Microwave-Assisted Incorporation of AgNP into Chitosan–Alginate Hydrogels for Antimicrobial Applications
Source: MDPI journal article supplement (doi:10.3390/jfb14040199), 2023-04-04
Supplement: s1 [file s1]

## Supplementary Information

### **Microwave-Assisted Incorporation of AgNP into Chitosan–Alginate Hydrogels for Antimicrobial Applications**

**Takuma Oe<sup>1</sup>**, Duangkamol Dechojarassri<sup>1,2</sup>, Sachiro Kakinoki<sup>1,2</sup>, Hideya Kawasaki<sup>1,2</sup>, Tetsuya Furuike<sup>1,2</sup>, Hiroshi Tamura<sup>1,2</sup>

<sup>1</sup>Faculty of Chemistry, Materials and Bioengineering, Kansai University

<sup>2</sup>ORDIST, Kansai University, 3–3–35 Yamate-cho, Suita, Osaka 564–8680, Japan

\*Corresponding author: E-mail: tamura@kansai-u.ac.jp, Tel: +81 6 6368 0871

#### **Supplementary information figure captions**

**Fig. S1** † FT-IR spectra of SA-AgNPs/CS gels before and after sterilization.

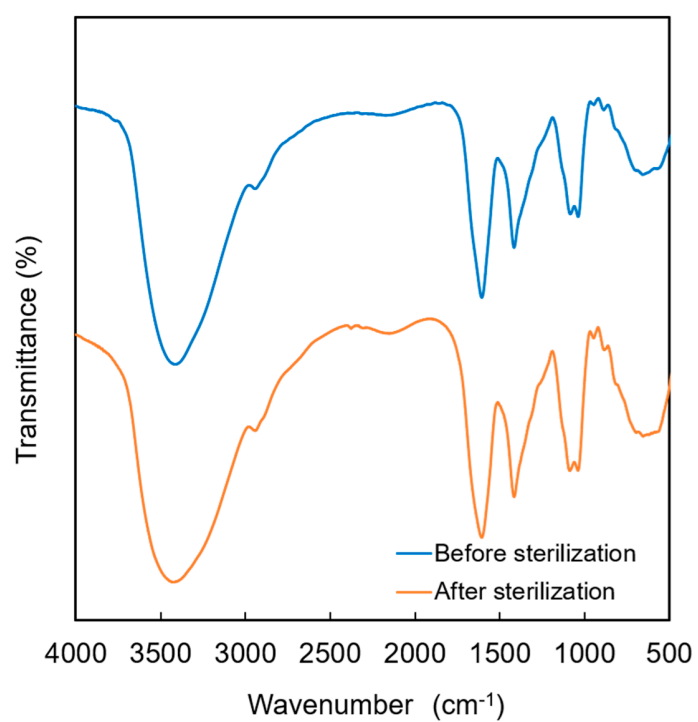

**Fig. S1** † FTIR spectra of SA-AgNPs/CS gels before and after sterilization.
